# Supplementary material
Source: publisher site journal article supplement (https://www.dovepress.com/article/375279)
Supplement: Supplementary file 1 [file get_supplementary_file.php]

## Appendix 1 – Endometriosis Quiz

Age

Profession

What is endometriosis

How common is endometriosis?

Common symptoms of endometriosis?

Differential diagnosis

Diagnostics

Treatment

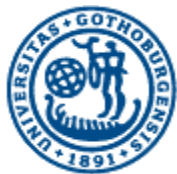

GÖTEBORGS UNIVERSITET  
SAHLGRENSKA AKADEMIN

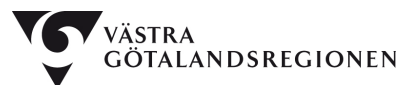

## QUESTIONNAIRE

Age\_\_\_\_\_

Level of Education: Primary School, Secondary School, Vocational School, University

Is your menstrual cycle regular? YES NO

Been pregnant if YES, number of children: \_\_\_\_\_ YES NO

Are you involuntarily childless? YES NO

Do you feel depressed? YES NO

Do you suffer from a general feeling of illness (fatigue, lack of energy, nausea)? YES NO

Do you feel easily irritated? YES NO

Do you suffer from pains in your body? YES NO

Do you suffer from stomach pain? YES NO

Do you have abdominal pain during menstruation? YES NO

Do you need to take pain relief during menstruation? YES NO

Do you have any medication for menstrual pain other than pain relief? YES NO

if YES, which one(s)?\_\_\_\_\_

Do you need to stay home from school/work in connection with menstruation if YES,  
number of days:\_\_\_\_\_ YES NO

Do you have bowel problems? YES NO
